# Supplementary material for: Comparison of transcatheter and surgical aortic valve replacement long-term outcomes: a retrospective cohort study with overlap propensity score weighting
Source: HighWire-hosted journal article supplement (doi:10.1136/openhrt-2022-002205), 2023-04-01
Supplement: openhrt-2022-002205supp001_data_supplement.pdf [file openhrt-2022-002205supp001_data_supplement.pdf]

**Supplemental Table 1. Key covariates and coding details**

| Key covariates                   | Database          | Coding details                                                                                                                                                                                                                                                                                       |
|----------------------------------|-------------------|------------------------------------------------------------------------------------------------------------------------------------------------------------------------------------------------------------------------------------------------------------------------------------------------------|
| Stroke/ TIA                      | CIHI-DAD<br>NACRS | ICD-10: I60, I61, I63 (excluding I63.6), I64, H34.0, H34.1, G45 (excluding G45.4)                                                                                                                                                                                                                    |
| Myocardial infarction            | CIHI-DAD<br>NACRS | ICD-10: I21, I22, I25.2                                                                                                                                                                                                                                                                              |
| Acute kidney injury              | CIHI-DAD<br>NACRS | Include where a diagnosis code for acute kidney injury (see codes below) occurs with $\geq 1$ code for dialysis (see CCI codes below) during same admission<br><u>Acute kidney injury</u><br>ICD-10: N17.0-N17.9, O08.4, T79.5, O90.4<br><br><u>Dialysis</u><br>CCI: IPZ21HQBR, IPZ21HPD4, 1PZ21HQBS |
| Vascular complications           | CIHI-DAD<br>NACRS | ICD-10: T82.0, T82.2, T82.3, T82.5-T82.9                                                                                                                                                                                                                                                             |
| Atrial fibrillation              | CIHI-DAD<br>NACRS | ICD-10: I48                                                                                                                                                                                                                                                                                          |
| Endocarditis                     | CIHI-DAD<br>NACRS | ICD-10: I33, I39, I01.1, I35.8, T82.6, I05.9, I08.0, I08.1, I08.2, I08.3, I08.9, I07.9                                                                                                                                                                                                               |
| Permanent pacemaker implantation | CIHI-DAD          | CCI: 1HZ53GRNM, 1HZ53GRNK, 1HZ53GRNL, 1HZ53LANL, 1HZ53LANM, 1HZ53LANK, 1HZ53GRFR, 1HZ53LAFR, 1HZ53SYFR                                                                                                                                                                                               |
| Defibrillator                    | CIHI-DAD          | CCI: 1HZ53GRFS, 1HZ53LAFS                                                                                                                                                                                                                                                                            |
| Chronic dialysis                 | CIHI-DADOHIP      | CCI: 1PZ21HQBR, 1PZ21HPD4, 1PZ21HQBS<br>OHIP: R849, R850, G323, G325, G326, G330, G331, , G860, G333, G083, G091, G085, G295, G082, G090, G092, G093, G094, G861, G862, G863, G864, G865, G866, G294, G095, G096                                                                                     |

|                                       |                         |                                                                                                                                                                                                                                                                                                                                                                                                                                                                                                                                                                                                                      |
|---------------------------------------|-------------------------|----------------------------------------------------------------------------------------------------------------------------------------------------------------------------------------------------------------------------------------------------------------------------------------------------------------------------------------------------------------------------------------------------------------------------------------------------------------------------------------------------------------------------------------------------------------------------------------------------------------------|
|                                       |                         | Two codes 90 at least 90 days apart but not more than 150 days apart.                                                                                                                                                                                                                                                                                                                                                                                                                                                                                                                                                |
| Chronic obstructive pulmonary disease | CIHI-DAD<br>NACRS       | I278, I279, J40-J47, J60-J67, J684, J701, J703                                                                                                                                                                                                                                                                                                                                                                                                                                                                                                                                                                       |
| Cancer                                | CIHI-DAD<br>NACRS       | Primary Cancer:<br>ICD-10: C00-C26, C30-C34, C37-C41, C43, C45-C58, C60-C76, C81-C85, C88, C90-C97<br>Metastatic Cancer:<br>-<br>ICD-10: C77-C80                                                                                                                                                                                                                                                                                                                                                                                                                                                                     |
| Dementia                              | ICES DEMENTIA<br>COHORT | ICES-validated algorithm: earliest of either the earliest hospitalization or same-day-surgery record with a dementia diagnosis; the earliest date of the first of three physician outpatient visits for dementia that were at least 30 days apart in a 2-year period during follow-up; or the earliest dispensing date in a prescription drug reimbursement record for any cholinesterase inhibitor.<br>ICD-9: 46.1x, 290.0x, 290.1x, 290.2x, 290.3x, 290.4x, 294.1x, 294.2x, 331.0x, 331.1x, 331.5x<br>ICD-10: F00, F01, F02, F03, G30<br>OHIP DX CODE: 290, 331<br>ODB: SUBCLASS NAME = 'CHOLINESTERASE INHIBITOR' |

CIHI-DAD, Canadian Institute for Health Information- Discharge Abstract Database.

OHIP, Ontario Health Insurance Plan.

ICD, International Classification of Diseases.

CCI, Canadian Classification of Health Interventions.

### References:

The reference below is pasted in from the ICES web page describing the ICES derived cohorts, including the DEMENTIA cohort. This is the paper listed as the citation for the DEMENTIA cohort dataset:

Jaakkimainen RL , Bronskill SE, Tierney M, Hermann N, Green D, Young J, Ivers N, Butt D, Tu K. Identification of physician-diagnosed Alzheimer's disease and related dementias in population-based administrative data: a validation study using family physicians' electronic medical records. *Journal of Alzheimer's Disease*, 54(2016): 337-349.

**Supplemental Table 2. Primary end points at 1, 3 and 5 years. Competing risk model reporting subdistribution hazard ratios and 95% confidence intervals of primary outcomes occurring from date of discharge to 1, 3 and 5 years for patients undergoing TAVR vs. SAVR.**

|                     | At 1 year      |               |                          | At 3 years     |               |                          | At 5 years     |                  |                          |
|---------------------|----------------|---------------|--------------------------|----------------|---------------|--------------------------|----------------|------------------|--------------------------|
|                     | TAVR<br>N (%)  | SAVR<br>N (%) | Hazard Ratio<br>(95% CI) | TAVR<br>N (%)  | SAVR<br>N (%) | Hazard Ratio<br>(95% CI) | TAVR<br>N (%)  | SAVR<br>N (%)    | Hazard Ratio<br>(95% CI) |
| All-cause mortality | 299<br>(11.72) | 334<br>(3.64) | 1.37<br>(1.12-1.68)      | 641<br>(25.13) | 761<br>(8.29) | 1.58<br>(1.38-1.81)      | 815<br>(31.95) | 1,204<br>(13.11) | 1.58<br>(1.41-1.78)      |
| Non-CV mortality    | 152<br>(5.96)  | 168<br>(1.83) | 1.45<br>(1.10-1.90)      | 344<br>(13.48) | 445<br>(4.85) | 1.50<br>(1.25-1.79)      | 457<br>(17.91) | 735<br>(8.00)    | 1.50<br>(1.29-1.75)      |
| CV mortality        | 147<br>(5.76)  | 166<br>(1.81) | 1.28<br>(0.95-1.72)      | 297<br>(11.64) | 316<br>(3.44) | 1.70<br>(1.38-2.09)      | 358<br>(14.03) | 469<br>(5.11)    | 1.72<br>(1.44-2.07)      |

TAVR, transcatheter aortic valve replacement. SAVR, surgical aortic valve replacement. N, the number of events. CI, confidence interval. CV mortality, cardiovascular mortality.

**Supplemental Table 3. Sensitivity analysis results. Competing risk model reporting subdistribution hazard ratios and 95% confidence intervals of primary and secondary outcomes occurring from date of discharge to 1, 3 and 5 years for patients undergoing TAVR vs. SAVR.**

|                     | At 1 year                    |                              |                     | At 3 years                   |                              |                     | At 5 years                   |                              |                     |
|---------------------|------------------------------|------------------------------|---------------------|------------------------------|------------------------------|---------------------|------------------------------|------------------------------|---------------------|
|                     | Sensitivity analysis model 1 | Sensitivity analysis model 2 | Original model      | Sensitivity analysis model 1 | Sensitivity analysis model 2 | Original model      | Sensitivity analysis model 1 | Sensitivity analysis model 2 | Original model      |
| All-cause mortality | 1.52<br>(1.21-1.90)          | 1.35<br>(1.10-1.65)          | 1.37<br>(1.12-1.68) | 1.59<br>(1.37-1.85)          | 1.57<br>(1.37-1.80)          | 1.58<br>(1.38-1.81) | 1.56<br>(1.37-1.77)          | 1.58<br>(1.40-1.77)          | 1.58<br>(1.41-1.78) |
| Non-CV mortality    | 1.53<br>(1.14-2.06)          | 1.43<br>(1.08-1.89)          | 1.45<br>(1.10-1.90) | 1.44<br>(1.19-1.75)          | 1.49<br>(1.25-1.79)          | 1.50<br>(1.25-1.79) | 1.44<br>(1.23-1.70)          | 1.50<br>(1.29-1.74)          | 1.50<br>(1.29-1.75) |
| CV mortality        | 1.50<br>(1.07-2.11)          | 1.25<br>(0.93-1.68)          | 1.28<br>(0.95-1.72) | 1.86<br>(1.47-2.35)          | 1.68<br>(1.37-2.07)          | 1.70<br>(1.38-2.09) | 1.77<br>(1.45-2.17)          | 1.71<br>(1.43-2.06)          | 1.72<br>(1.44-2.07) |
| Ischemic stroke     | 0.99<br>(0.65-1.52)          | 1.07<br>(0.71-1.60)          | 1.07<br>(0.71-1.61) | 1.24<br>(0.91-1.70)          | 1.30<br>(0.97-1.74)          | 1.30<br>(0.97-1.74) | 1.13<br>(0.84-1.52)          | 1.17<br>(0.90-1.53)          | 1.17<br>(0.90-1.53) |
| Hemorrhagic stroke  | 1.31<br>(0.60-2.82)          | 1.05<br>(0.53-2.08)          | 1.06<br>(0.53-2.10) | 1.18<br>(0.63-2.20)          | 1.10<br>(0.62-1.94)          | 1.10<br>(0.63-1.95) | 1.14<br>(0.64-2.01)          | 1.13<br>(0.66-1.93)          | 1.14<br>(0.67-1.94) |
| MI                  | 2.12<br>(1.44-3.12)          | 1.77<br>(1.26-2.50)          | 1.77<br>(1.26-2.50) | 2.30<br>(1.75-3.01)          | 1.92<br>(1.52-2.43)          | 1.92<br>(1.51-2.43) | 2.24<br>(1.77-2.85)          | 1.96<br>(1.59-2.43)          | 1.96<br>(1.58-2.42) |
| Incident AF         | 0.80<br>(0.58-1.11)          | 0.73<br>(0.54-0.98)          | 0.73<br>(0.54-0.98) | 1.08<br>(0.84-1.38)          | 1.05<br>(0.83-1.33)          | 1.05<br>(0.83-1.33) | 1.17<br>(0.94-1.49)          | 1.14<br>(0.92-1.42)          | 1.14<br>(0.92-1.42) |
| Endocarditis        | 1.17<br>(0.80-1.73)          | 1.07<br>(0.75-1.55)          | 1.07<br>(0.75-1.54) | 1.35<br>(0.98-1.84)          | 1.23<br>(0.92-1.65)          | 1.23<br>(0.92-1.65) | 1.24<br>(0.93-1.66)          | 1.16<br>(0.89-1.52)          | 1.16<br>(0.89-1.52) |

|                         |                      |                     |                     |                      |                     |                     |                      |                     |                     |
|-------------------------|----------------------|---------------------|---------------------|----------------------|---------------------|---------------------|----------------------|---------------------|---------------------|
| Reintervention,<br>any  | 4.16<br>(1.86-9.31)  | 2.00<br>(0.96-4.15) | 2.00<br>(0.97-4.16) | 2.62<br>(1.39-4.94)  | 1.73<br>(0.96-3.11) | 1.73<br>(0.96-3.11) | 2.26<br>(1.25-4.07)  | 1.64<br>(0.93-2.88) | 1.64<br>(0.93-2.89) |
| Complication<br>(valve) | 1.47<br>(1.00-2.18)  | 1.40<br>(0.98-1.99) | 1.40<br>(0.98-2.00) | 1.32<br>(0.97-1.80)  | 1.35<br>(1.02-1.79) | 1.35<br>(1.02-1.79) | 1.21<br>(0.91-1.60)  | 1.25<br>(0.96-1.62) | 1.25<br>(0.96-1.62) |
| AKI                     | 1.85<br>(0.86-3.95)  | 1.64<br>(0.80-3.39) | 1.65<br>(0.80-3.40) | 1.63<br>(0.88-3.03)  | 1.53<br>(0.85-2.75) | 1.53<br>(0.85-2.76) | 1.44<br>(0.82-2.52)  | 1.41<br>(0.83-2.39) | 1.41<br>(0.83-2.39) |
| Pacemaker               | 0.99<br>(0.61-1.58)  | 0.99<br>(0.64-1.54) | 0.99<br>(0.64-1.54) | 1.13<br>(0.78-1.62)  | 1.11<br>(0.79-1.57) | 1.11<br>(0.79-1.56) | 1.31<br>(0.94-1.84)  | 1.32<br>(0.95-1.84) | 1.32<br>(0.95-1.83) |
| Defibrillator           | 2.37<br>(0.40-14.13) | 0.94<br>(0.22-4.05) | 0.94<br>(0.22-4.03) | 5.65<br>(1.36-23.52) | 2.00<br>(0.70-5.73) | 1.99<br>(0.70-5.71) | 4.25<br>(1.23-14.67) | 1.75<br>(0.66-4.60) | 1.74<br>(0.66-4.58) |
| Readmission             | 0.91<br>(0.84-0.98)  | 0.89<br>(0.83-0.95) | 0.89<br>(0.82-0.95) | 0.96<br>(0.90-1.03)  | 0.95<br>(0.89-1.01) | 0.95<br>(0.89-1.01) | 0.97<br>(0.91-1.04)  | 0.96<br>(0.90-1.02) | 0.96<br>(0.90-1.02) |
| CHF readmission         | 0.88<br>(0.73-1.06)  | 0.87<br>(0.73-1.03) | 0.87<br>(0.73-1.03) | 1.19<br>(1.02-1.39)  | 1.18<br>(1.02-1.37) | 1.18<br>(1.02-1.37) | 1.27<br>(1.10-1.47)  | 1.28<br>(1.12-1.47) | 1.28<br>(1.11-1.46) |
| Angina<br>readmission   | 2.29<br>(1.33-3.94)  | 1.94<br>(1.21-3.11) | 1.93<br>(1.21-3.10) | 2.34<br>(1.64-3.33)  | 1.87<br>(1.37-2.54) | 1.86<br>(1.37-2.54) | 2.23<br>(1.62-3.08)  | 1.86<br>(1.40-2.49) | 1.86<br>(1.39-2.48) |

TAVR, transcatheter aortic valve replacement. SAVR, surgical aortic valve replacement. N, the number of events. CI, confidence interval. CV mortality, cardiovascular mortality.

Sensitivity analysis model 1: adding index procedure year to the calculation of weights

Sensitivity analysis model 2: adding binary (Yes/No) variable of new-onset cardiovascular medications to the calculation of weights.
